# Supplementary material
Source: HighWire-hosted journal article supplement (https://bibliotheek.ehb.be/content/57/7/479)
Supplement: inline-supplementary-material-2 [file inline-supplementary-material-2.xlsx]

## Sheet: Intellectual_Disability_Data
	Costs of Intellectual Disability Data															www.xe.com 08/05/2019
														GPB		USD	USD		USD	AUD		USD
	Costs in excess						HEALTH CARE COSTS (PER YEAR)							1		1.31	1		1	1		0.7
	Unclear if costs in excess						Hospital Costs												Community Services Costs
	Study Details	Limited to ID only	Age/Severity Group	Grouping	Currency Year		Outpatient	SD		Inpatient	SD		Emergency	SD		Total hospital services	SD		GP Services	SD		Psychiatrist	SD		Psychologist	SD		Psych nurse	SD		ID nurse	SD		Other nurse	SD		Speech therapist	SD		Physiotherapist	SD		Chiropodist	SD		OT	SD		Alternative therapist
	Doran CM Jounral of Intellectual & Developmental Disability 2012;37:42	Not clear if patients also had some physical disability	Overall aged 1 to 38 years	2	2006
			Mild	2
			Moderate	2
			Severe/profound	2
			Unknown	2
	McGill P Journal of Applied Research in Intellectual Disabilities 2012;25:584	13% had physical/health needs; authors note this information should be treated with caution.	Overall mean age 33 years	2	2010
			Challenging behaviour	2
			No challenging behaviour	2
			Mild/moderate	2
			Not mild/moderate	2
			In hospital	2
			Not in hospital	2
			Had a specific syndrome	2
			Did not have a specific syndrome	2
	Felce D Journal of Intellectual Disability Research 1998;42(5):390	The majority (87%) were ambulant.	Severe ID and challenging behaviour (mean age 32 years)	2	1996
	Flanders SC Administration and Policy in Mental Health 2007;34:213	Not clear if patients also had some physical disability	Children aged 3–17 years with a diagnosis of Pervasive Development Disorders	1	(1996-2002)		3053.76	NR		1820.35	NR		59.5064	NR		4933.62			148.766	NR																	73.0305	NR
	Kang T Disability and Health Journal 2008;1:30	19.3% had cerebral palsy or other significant motor dysfunction; 14.8% sits or uses a wheelchair	Young adults (mean age 26.7); (66% mild; 18.7 moderate; 9.3% severe; 6.0% profound)	2	2005
	Barron DA Health & Social Care in the Community 2013;21:283	85% had a mobility physical health diagnosis	16 to 18 (41% mild; 41% moderate; 18% severe) with challenging behaviour	1	2009		89.8702	30.0903		788.591	568.459		9.7157	4.71564		888.177	566.663		165.167	31.4376		756.205	274.068		328.715	117.528		36.4339	26.2728		6.47713	4.37881		387.009	115.758		2645.91	538.144					2.42893	1.90871		597.516	216.358		437.207
	Knapp M Autism 2009;13:317	Not clear if patients also had some physical disability	0 to 3	1	2006											0	NR
			4 to 11	1												1416.88	NR
			12 to 17	1												2608.57	NR
			18+ (adult)	2												7541.33	NR
			18+ (adult living in private household)	2
			18+ (adult supported living accommodation)	2
			18+ (adult living in residential care)	2
			18+ (adult living in hospital)	2
	Strydom A The British Journal of Psychiatry 2010;196:133	37% had mobility problems	>60 (mean age 69) (55% mild; 32% moderate; 13% severe)	4	2006		444.459	144.606		1786.38	1094.69		76.9256	62.8206		2316.31	1117.73		205.135	43.8559		145.304	71.1177		17.0946	15.4088		68.3783	46.2265					128.209	17.7794		17.0946	18.9647		42.7364	34.3736		94.0201	14.5791		85.4728	91.2677		205.135
	Felce D American Journal on Mental Retardation 2008;113(2):87	Not clear if patients also had some physical disability	Adults with relatively low support needs living in fully staffed group homes	3	2004											585.435	209.571
			Adults with relatively low support needs living in semi-independent living	3												788.88	370.054
	Robertson J American Journal on Mental Retardation 2006;11:400	Not clear if patients also had some physical disability	Adults wide range of ID before implementing person-centred planning	3	2004											612.665	358.373
			Adults wide range of ID after implementing person-centred planning	3												340.369	169.923
	Romeo R Journal of Intellectual Disability Research 2009;53:426	Not clear if patients also had some physical disability	50 adult participants with ID who received a health-check intervention	3	2003		209.208	360.112		882.151	2952.92					1091.36			233.216	209.208											68.5928	109.749
			50 adult participants with ID who received standard care	3			154.162	315.527		396.124	1212.74					550.286			192.06	188.63											77.1669	99.3491
	Hallam A Journal of Intellectual Disability Research 2002;46(5):394	Not clear if patients also had some physical disability	Adults living in village communities (least disabled)	3	1999
			Adults living in residential campuses (middle disabled)	3
			Adults living in dispersed housing (most disabled)	3
	Emerson E Journal of Intellectual and Development Disability 2000;25(4):263	Not clear if patients also had some physical disability	Adults living in dispersed housing (severe ID)	3	1998											654.111	NR
			Adults living in residential campuses (severe ID)	3												373.778	NR
	Knapp M Health and Social Care in the Community 2005;13:297	Not clear if patients also had some physical disability	Adults with ID and challenging behaviour (individual items are average for users; totals are averages for sample)	3	1997		8872.82	NR					2460.88	NR		663.566	NR		2198.3	NR		26.5426	NR		267.322	NR											460.704	NR								3905.56	NR
	Stancliffe RJ Journal of Intellectual and Developmental Disability 2000;25(4):281	3% in each group had cerebral palsy	Adults with ID living in group home (mean age 44.9 years)	3	1998
			Adults with ID living semi-independently (mean age 38.76 years)	3
	Sacco P Am Health Drug Benefits 2013;6(2):73	Not clear if patients also had some physical disability	Children 0-11 Commercial/Medicare	1	(2004-2009)											9222.38
			Children 0-11 Medicaid	1												17638.6
			Adolescents 12-17 Commercial/Medicare	1												6657.43
			Adolescents 12-17 Medicaid	1												12322.1
			Adults >=18 Commercial/Medicare	2												10280.2
			Adults >=18 Medicaid	2												11395.5
	Buescher AVS JAMA Pediatr 2014;168(8):721	Not clear if patients also had some physical disability	Children 0-1 with ID UK	1	2011											396.581
			Children 2-3 with ID UK	1												987.739
			Children 4-11 with ID UK	1												1467.5
			Children 12-17 with ID UK	1												2700.31
			Children 0-5 with ID US	1												14798.5
			Children 6-17 with ID US	1												20708.7
			Adults 18+ with ID UK	2												7637.52
			Adults 18+ with ID US	2												31076.4
	Child Yearly Totals
			Children 0-3 mild	1												9222.38
			Children 0-3 moderate	1												9222.38
			Children 0-3 severe/profound	1												9222.38
			Children 4-11 mild	1												3175.25
			Children 4-11 moderate	1												3175.25
			Children 4-11 severe/profound	1												3175.25
			Children 12-17 mild	1												3771.09
			Children 12-17 moderate	1												3771.09
			Children 12-17 severe/profound	1												3771.09
			Children 0-3 mild	1												13430.5
			Children 0-3 moderate	1												13430.5
			Children 0-3 severe/profound	1												13430.5
			Children 4-11 mild	1												7078
			Children 4-11 moderate	1												7078
			Children 4-11 severe/profound	1												7078
			Children 12-17 mild	1												5795.53
			Children 12-17 moderate	1												5795.53
			Children 12-17 severe/profound	1												5795.53
			Children 0-3 mild	1												17638.6
			Children 0-3 moderate	1												17638.6
			Children 0-3 severe/profound	1												17638.6
			Children 4-11 mild	1												17638.6
			Children 4-11 moderate	1												17638.6
			Children 4-11 severe/profound	1												17638.6
			Children 12-17 mild	1												12322.1
			Children 12-17 moderate	1												12322.1
			Children 12-17 severe/profound	1												12322.1
	Young Adult Yearly Totals
			Young adult mild	2												7541.33
			Young adult moderate	2												7541.33
			Young adult severe/profound	2												7541.33
			Young adult mild	2												13586.2
			Young adult moderate	2												13586.2
			Young adult severe/profound	2												13586.2
			Young adult mild	2												31076.4
			Young adult moderate	2												31076.4
			Young adult severe/profound	2												31076.4
	Adult Yearly Totals
			Adult mild	3												7541.33
			Adult moderate	3												7541.33
			Adult severe/profound	3												7541.33
			Adult mild	3												13586.2
			Adult moderate	3												13586.2
			Adult severe/profound	3												13586.2
			Adult mild	3												31076.4
			Adult moderate	3												31076.4
			Adult severe/profound	3												31076.4
	Elderly Adult Yearly Totals
			Elderly adult mild	4												1198.58
			Elderly adult moderate	4												1198.58
			Elderly adult severe/profound	4												1198.58
			Elderly adult mild	4												2316.31
			Elderly adult moderate	4												2316.31
			Elderly adult severe/profound	4												2316.31
			Elderly adult mild	4												3434.05
			Elderly adult moderate	4												3434.05
			Elderly adult severe/profound	4												3434.05
[truncated: 84 more columns]

## Sheet: Intellectual_Disability_Totals
	Costs of Intellectual Disability Totals
	Age/Severity Group	Value	Hospital Services Costs	Community Services Costs	Treatment / Aids / Adaptations Costs	Total Healthcare Costs	Accomodation Costs	Education Costs	Daytime Activities Costs	Income Support	Carer Costs	Loss of Productivity	Total Social Costs	Total Costs
	Children 0-3 mild	Mean	13430.5	961.569	40.2983	14432.4	984.065	2521.09	6163.2	12154	14370	10321.2	46513.5	60945.9
		Lower bound	9222.38	961.569	25.7223	10209.7	374.153	0	0	11847.8	14370	0	26592	36801.6
		Upper bound	17638.6	961.569	54.8743	18655.1	1535.83	3781.63	13029.5	12390.1	14370	22995	68102.1	86757.2
	Children 0-3 moderate	Mean	13430.5	961.569	40.2983	14432.4	984.065	2521.09	6163.2	11626.3	23315.6	10321.2	54931.4	69363.8
		Lower bound	9222.38	961.569	25.7223	10209.7	374.153	0	0	10660.6	23315.6	0	34350.3	44560
		Upper bound	17638.6	961.569	54.8743	18655.1	1535.83	3781.63	13029.5	12390.1	23315.6	22995	77047.7	95702.8
	Children 0-3 severe	Mean	13430.5	961.569	186.889	14579	984.065	2521.09	6163.2	12615.1	16761.5	10321.2	49366.2	63945.1
		Lower bound	9222.38	961.569	93.4444	10277.4	374.153	0	0	12390.1	16761.5	0	29525.8	39803.2
		Upper bound	17638.6	961.569	280.333	18880.5	1535.83	3781.63	13029.5	12885.3	16761.5	22995	70988.8	89869.4
	Children 4-11 mild	Mean	9297.29	5893.04	928.746	16119.1	3091.73	41594.1	12405.3	12476	46763.8	12662.4	129007	145126
		Lower bound	3175.25	431.342	55.295	3661.88	1417.56	17272.9	11781.2	11847.8	15786.9	3506.48	61612.8	65274.7
		Upper bound	17638.6	11354.7	1802.2	30795.6	3948.63	71995.7	13029.5	12988.1	77740.6	22995	202698	233493
	Children 4-11 moderate	Mean	9297.29	5893.04	928.746	16119.1	3091.73	41594.1	12405.3	11948.3	61653.6	12662.4	143369	159488
		Lower bound	3175.25	431.342	55.295	3661.88	1417.56	17272.9	11781.2	10660.6	24732.5	3506.48	69371.2	73033.1
		Upper bound	17638.6	11354.7	1802.2	30795.6	3948.63	71995.7	13029.5	12988.1	98574.8	22995	223532	254327
	Children 4-11 severe	Mean	9297.29	5893.04	1075.34	16265.7	3091.73	41594.1	12405.3	12772	69746.7	12662.4	152286	168551
		Lower bound	3175.25	431.342	123.017	3729.61	1417.56	17272.9	11781.2	12390.1	18178.4	3506.48	64546.7	68276.3
		Upper bound	17638.6	11354.7	2027.66	31021	3948.63	71995.7	13029.5	12988.1	121315	22995	246272	277293
	Children 12-17 mild	Mean	7296.24	544.413	926.288	8766.94	3493.84	40758.6	6889.89	12395.4	46134.5	12653.4	122326	131093
		Lower bound	3771.09	431.342	50.3779	4252.81	1736.23	31994.1	705.528	11847.8	14528.4	3443.05	64255.1	68507.9
		Upper bound	12322.1	657.483	1802.2	14781.8	4836.3	47019.9	13029.5	12842.9	77740.6	23032.1	178501	193283
	Children 12-17 moderate	Mean	7296.24	544.413	926.288	8766.94	3493.84	40758.6	6889.89	11867.7	61024.4	12653.4	136688	145455
		Lower bound	3771.09	431.342	50.3779	4252.81	1736.23	31994.1	705.528	10660.6	23474	3443.05	72013.5	76266.3
		Upper bound	12322.1	657.483	1802.2	14781.8	4836.3	47019.9	13029.5	12842.9	98574.8	23032.1	199335	214117
	Children 12-17 severe	Mean	7296.24	17904.4	1072.88	26273.5	3493.84	40758.6	6889.89	12691.4	69117.4	12653.4	145605	171878
		Lower bound	3771.09	12820.8	118.1	16710	1736.23	31994.1	705.528	12390.1	16919.9	3443.05	67189	83899
		Upper bound	12322.1	22988	2027.66	37337.8	4836.3	47019.9	13029.5	12842.9	121315	23032.1	222076	259413
	Young adult 18-29 mild	Mean	17401.3	1398.29	135.633	18935.2	73160.8	2689.1	8567.12	13899.5	74503.1	29412	202232	221167
		Lower bound	7541.33	954.995	121.057	8617.39	51511.2	1320.96	3774.24	11847.8	59553.8	15494.6	143503	152120
		Upper bound	31076.4	2110.29	150.209	33336.9	86334.8	3757.52	13360	15541.1	86215	40604	245812	279149
	Young adult 18-29 moderate	Mean	17401.3	1398.29	135.633	18935.2	73160.8	2689.1	8567.12	13371.9	91374.4	29412	218575	237511
		Lower bound	7541.33	954.995	121.057	8617.39	51511.2	1320.96	3774.24	10660.6	74443.7	15494.6	157205	165823
		Upper bound	31076.4	2110.29	150.209	33336.9	86334.8	3757.52	13360	15541.1	98574.8	40604	260702	294039
	Young adult 18-29 severe	Mean	17401.3	2966.27	282.224	20649.8	80854	2689.1	8567.12	14360.7	104350	29412	240233	260883
		Lower bound	7541.33	1930.47	188.779	9660.58	51511.2	1320.96	3774.24	12885.3	82536.7	15494.6	167523	177184
		Upper bound	31076.4	4002.07	375.668	35454.2	99169.1	3757.52	13360	15541.1	121315	40604	293747	329201
	Adult 30-59 mild	Mean	17401.3	1398.29	135.633	18935.2	60331.1	0	13598.5	13899.5	74503.1	29412	191744	210679
		Lower bound	7541.33	954.995	121.057	8617.39	21389.8	0	9891.14	11847.8	59553.8	15494.6	118177	126794
		Upper bound	31076.4	2110.29	150.209	33336.9	86334.8	0	15856.9	15541.1	86215	40604	244552	277889
	Adult 30-59 moderate	Mean	17401.3	1398.29	135.633	18935.2	63061.3	0	13413	13371.9	91374.4	29412	210633	229568
		Lower bound	7541.33	954.995	121.057	8617.39	21389.8	0	9891.14	10660.6	74443.7	15494.6	131880	140497
		Upper bound	31076.4	2110.29	150.209	33336.9	86334.8	0	15856.9	15541.1	98574.8	40604	259442	292779
	Adult 30-59 severe	Mean	17401.3	2966.27	282.224	20649.8	75889.7	0	7538.16	14360.7	104350	29412	231550	252200
		Lower bound	7541.33	1930.47	188.779	9660.58	55739.5	0	6397.94	12885.3	82536.7	15494.6	173054	182715
		Upper bound	31076.4	4002.07	375.668	35454.2	91881.6	0	9344.44	15541.1	121315	40604	278686	314140
	Elderly adult >60 mild	Mean	2316.31	2401.79	100.129	4818.23	60331.1	0	11521.7	13418.5	75537	2261.8	162669	167487
		Lower bound	1198.58	1857.74	74.5301	3130.85	21389.8	0	9528.07	11847.8	60026.4	2211.28	105121	108252
		Upper bound	3434.05	2945.84	125.728	6505.61	86334.8	0	13515.4	14675.1	87810.1	2328.98	204547	211052
	Elderly adult >60 moderate	Mean	2316.31	2401.79	100.129	4818.23	63061.3	0	11521.7	12890.9	92408.3	2261.8	181743	186561
		Lower bound	1198.58	1857.74	74.5301	3130.85	21389.8	0	9528.07	10660.6	74916.3	2211.28	118824	121955
		Upper bound	3434.05	2945.84	125.728	6505.61	86334.8	0	13515.4	14675.1	99608.6	2328.98	219437	225942
	Elderly adult >60 severe	Mean	2316.31	2401.79	246.72	4964.82	75889.7	0	11521.7	13879.7	105384	2261.8	208535	213500
		Lower bound	1198.58	1857.74	142.252	3198.57	55739.5	0	9528.07	12885.3	83009.4	2211.28	163491	166690
		Upper bound	3434.05	2945.84	351.187	6731.07	91881.6	0	13515.4	14675.1	122910	2328.98	245193	251925

## Sheet: Physical_Disability_Data
	Costs of Physical Disability Data															www.xe.com 08/05/2019
											EURO		USD	GPB		USD	USD		USD	AUD		USD
	Costs in excess						HEALTH CARE COSTS (PER YEAR)				1		1.12	1		1.31	1		1	1		0.7
	Unclear if costs in excess						Hospital Costs												Community Services Costs
	Study Details	Limited to PD only	Age/Severity Group	Grouping	Currency Year		Outpatient	SD		Inpatient	SD		Emergency	SD		Total hospital services	SD		GP Services	SD		Specialist	SD		Psychiatrist	SD		Psychologist	SD		Psych nurse	SD		Other nurse	SD		Speech therapist	SD		Physiotherapist	SD		Chiropodist	SD		OT	SD		Alternative therapist
	Noyes J Health and Social Care in the Community 2006;14:508	Not clear if patients also had some intellectual disability	Ventilator-dependent children (aged 1-18) living in hospital	1	2002					775850	148334
			Ventilator-dependent children (aged 1-18) living at home	1			1048.29	533.707		31141	62104.7		43.4615	92.1383		32232.8	NR
	Kancherla V Research in Development Disabilities 2012;33(3):832	Without concurrent intellectual disability	Child with cerebral palsy without intellectual disability	1	2005		13799.8	NR		3413.4	NR
	Bent N Lancet 2002;360:1280	Patients had either mild or no learning disability; excluded individuals who had only sensory or learning disabilities	Physically disabled young people with mild or no learning disability treated via young adult team approch (aged 17–28 years (mean 20.4)	2	1999														370.895	NR		256.773	NR														378.028	NR		852.345	NR					96.2901	NR
			Physically disabled young people with mild or no learning disability treated via ad hoc approch (aged 17–28 years (mean 20.4)	2															317.401	NR		213.978	NR														281.738	NR		1241.07	NR					139.086	NR
	Revill P European Journal of Disability Research 2013;7:260	Not clear if patients also had some intellectual disability	Young children with severe disabilities treated in hosiptal	1	2008
			Young children with severe disabilities treated with homecare	1
	Beecham J Health and Social Care in the Community 2001;9:51	Approximately 26% had IQ below 70	Young adults (age 16-24) with hemiplegic cerebral palsy	2	1999		15.6382	NR		134.289	NR		14.3009	NR
	Knapp M Child Care and Health Development 2008;34:512	Not clear if some patients had some intellectual disability	Unemployed disabled male (overall sample 50% experiencing transition; average age 20 and 50% post-transition; average age 30)	2	2006
			Unemployed disabled female	2
			Employed disabled male	2
			Employed disabled female	2
	Pumkam C Disability and Health Journal 2013;6:287	Persons with mental disorders were excluded	Working age adults (18-64) with persistent physical impairments only	3	Average over 2007 and 2008		1427.29	76.4404		5952.8	702.297		371.453	32.2483
	Woolley M Family Fund 2004	Not clear if some patients had some intellectual disability	Severely disabled (not specifically physical disability) or seriously ill child	1	2004
	Frisch J Physical Disability Council of Australia 2001 & Walsh J Department of Family and Community Services 1999	Not clear if some patients had some intellectual disability	Disability Support Pension recipients with musculoskeletal impairments and non-zero costs (eligible age 16-64)	3	1998
	Frisch J Physical Disability Council of Australia 2001 & Huges D The Australian Quadriplegic Association 1999	Not clear if some patients had some intellectual disability	Australian Quadriplegic Association members, most of whom had spinal cord injuries	3	1998
	Child Yearly Totals
			Children 0-18 severe in hospital	1												627516
			Children 0-18 severe at home	1												0
			Children 0-18 severe in hospital	1												775850
			Children 0-18 severe at home	1												17213.2
			Children 0-18 severe in hospital	1												924184
			Children 0-18 severe at home	1												31141
	Young Adult Yearly Totals
			Young adults 18-30 employed	2												164.228
			Young adults 18-30 unemployed	2												164.228
			Young adults 18-30 employed	2												164.228
			Young adults 18-30 unemployed	2												164.228
			Young adults 18-30 employed	2												164.228
			Young adults 18-30 unemployed	2												164.228
	Adult Yearly Totals
			Adults 30+ employed	3												7751.54
			Adults 30+ unemployed	3												7751.54
			Adults 30+ employed	3												7751.54
			Adults 30+ unemployed	3												7751.54
			Adults 30+ employed	3												7751.54
			Adults 30+ unemployed	3												7751.54
[truncated: 93 more columns]

## Sheet: Physical_Disability_Totals
	Costs of Physical Disability Totals
	Age/Severity Group	Value	Hospital Services Costs	Community Services Costs	Treatment / Aids / Adaptations Costs	Total Healthcare Costs	Accommodation Costs	Education Costs	Daytime Activities Cost	Income Support	Carer Costs	Loss of Productivity	Total Social Costs	Total Costs
	Children 0-17 severe at home	Mean	16118.1	5983.77	28296.2	50398.1	0	12417.8	0	12219.8	64286	24987.5	113911	164309
		Lower bound	0	5983.77	25310.2	31294	0	1178.67	0	12219.8	10600.5	24987.5	48986.5	80280.5
		Upper bound	31141	5983.77	31387.9	68512.7	0	23656.9	0	12219.8	117971	24987.5	178836	247348
	Children 0-17 severe at hospital	Mean	775850	10549	17374.2	803773	0	7794.67	0	12219.8	49686.2	30234.2	99934.9	903708
		Lower bound	627516	10549	8841.8	646907	0	0	0	12219.8	7693.42	30234.2	50147.4	697054
		Upper bound	924184	10549	26000.4	960733	0	16725.7	0	12219.8	94487.9	30234.2	153668	1.1144e+06
	Young adults 18-29 employed	Mean	164.228	1913.95	1681.99	3760.17	2954.6	0	888.864	365.058	12813.7	14493.7	31515.9	35276
		Lower bound	164.228	577.865	638.61	1380.7	2647.87	0	0	365.058	0	10980.9	13993.9	15374.6
		Upper bound	164.228	2845.91	2561.8	5571.94	3568.06	0	1991.85	365.058	20511.3	17711.2	44147.5	49719.4
	Young adults 18-29 unemployed	Mean	164.228	1913.95	1681.99	3760.17	2954.6	2919.23	1991.85	8235.71	12813.7	44354.1	73269.2	77029.4
		Lower bound	164.228	577.865	638.61	1380.7	2647.87	0	1991.85	8235.71	0	20987.8	33863.2	35243.9
		Upper bound	164.228	2845.91	2561.8	5571.94	3568.06	4378.84	1991.85	8235.71	20511.3	62557.2	101243	106815
	Adults 30-60 employed	Mean	7751.54	218.851	1681.99	9652.38	2954.6	0	888.864	365.058	12813.7	14493.7	31515.9	41168.2
		Lower bound	7751.54	0	638.61	8390.15	2647.87	0	0	365.058	0	10980.9	13993.9	22384
		Upper bound	7751.54	352.892	2561.8	10666.2	3568.06	0	1991.85	365.058	20511.3	17711.2	44147.5	54813.7
	Adults 30-60 unemployed	Mean	7751.54	218.851	1681.99	9652.38	2954.6	0	1991.85	8235.71	12813.7	44354.1	70350	80002.4
		Lower bound	7751.54	0	638.61	8390.15	2647.87	0	1991.85	8235.71	0	20987.8	33863.2	42253.3
		Upper bound	7751.54	352.892	2561.8	10666.2	3568.06	0	1991.85	8235.71	20511.3	62557.2	96864.1	107530
